# Supplementary material
Source: publisher figshare collection journal article supplement (https://plos.figshare.com/articles/dataset/_/1571733)

# Adult Lower Muscular Limb

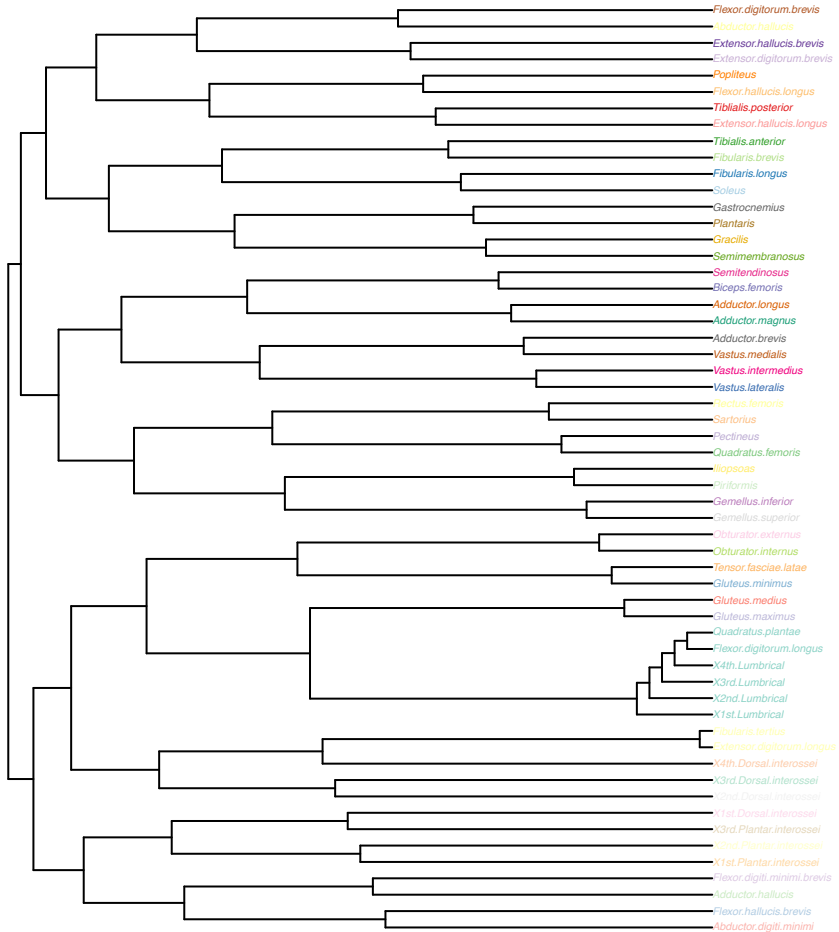

# Adult Lower Musculoskeletal Limb

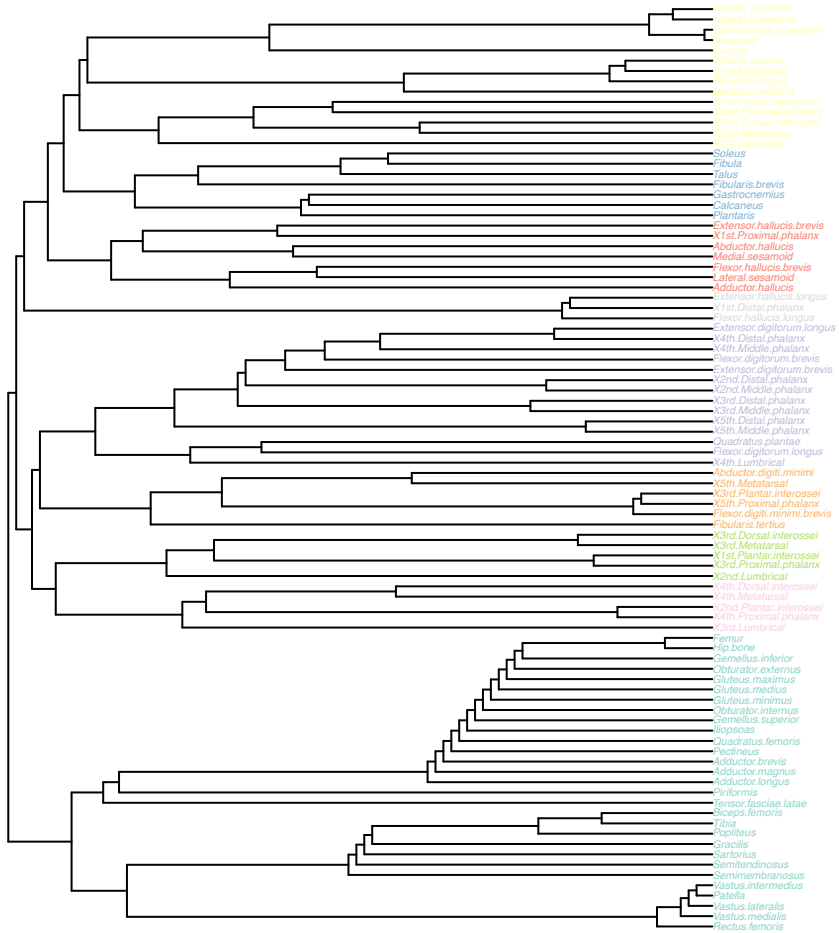

# Adult Lower Skeletal Limb

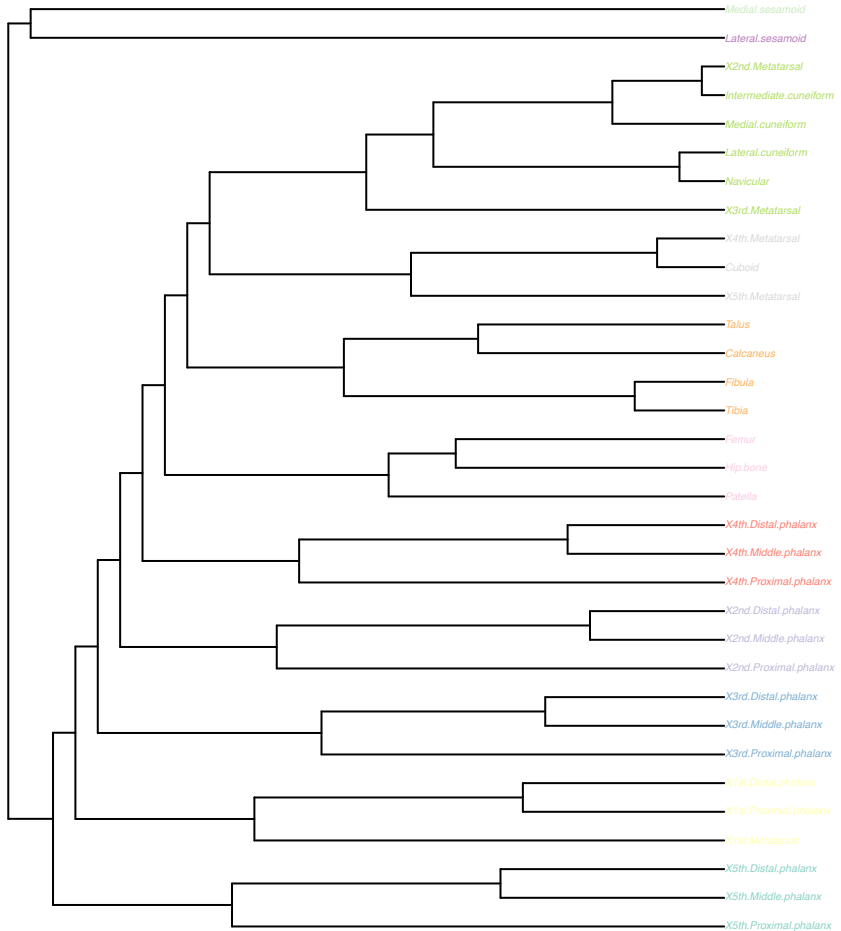

# Adult & Newborn Upper Muscular Limb

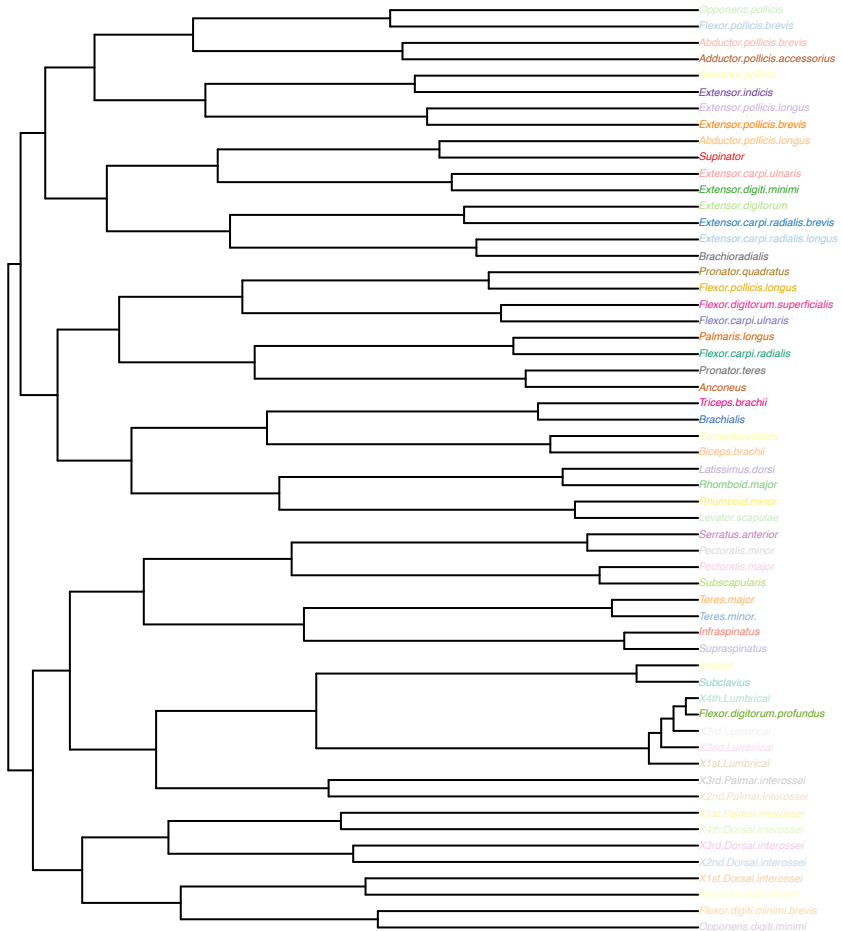

# Adult & Newborn Upper Musculoskeletal Limb

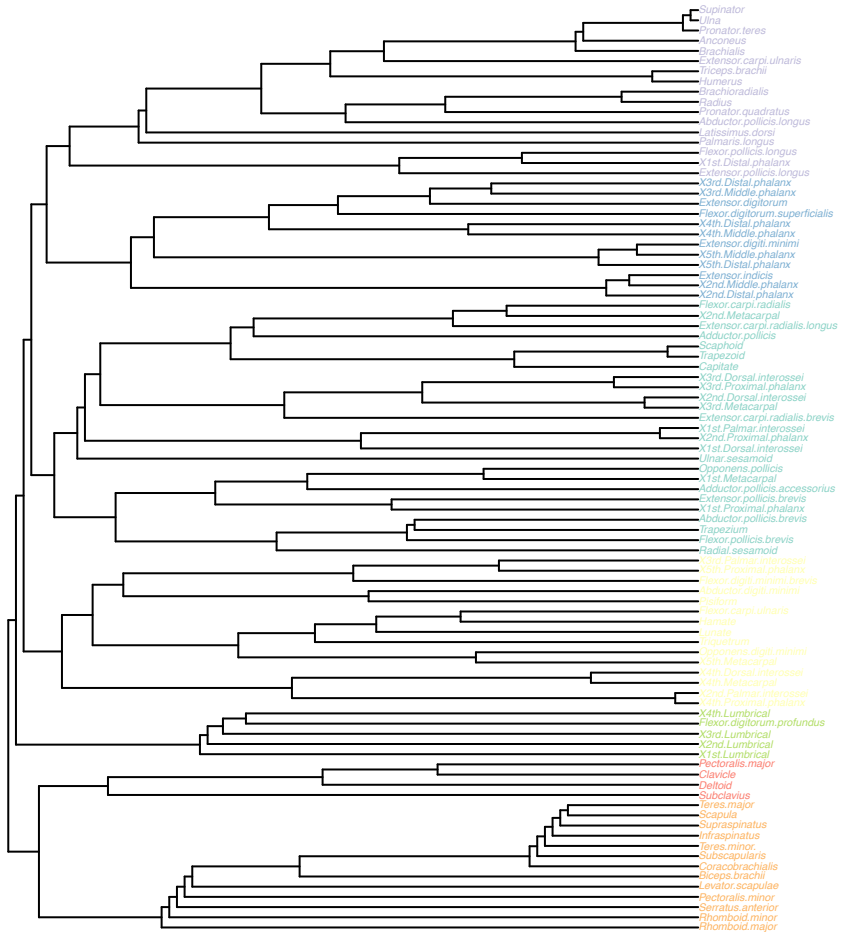

## Adult & Newborn Upper Skeletal Limb

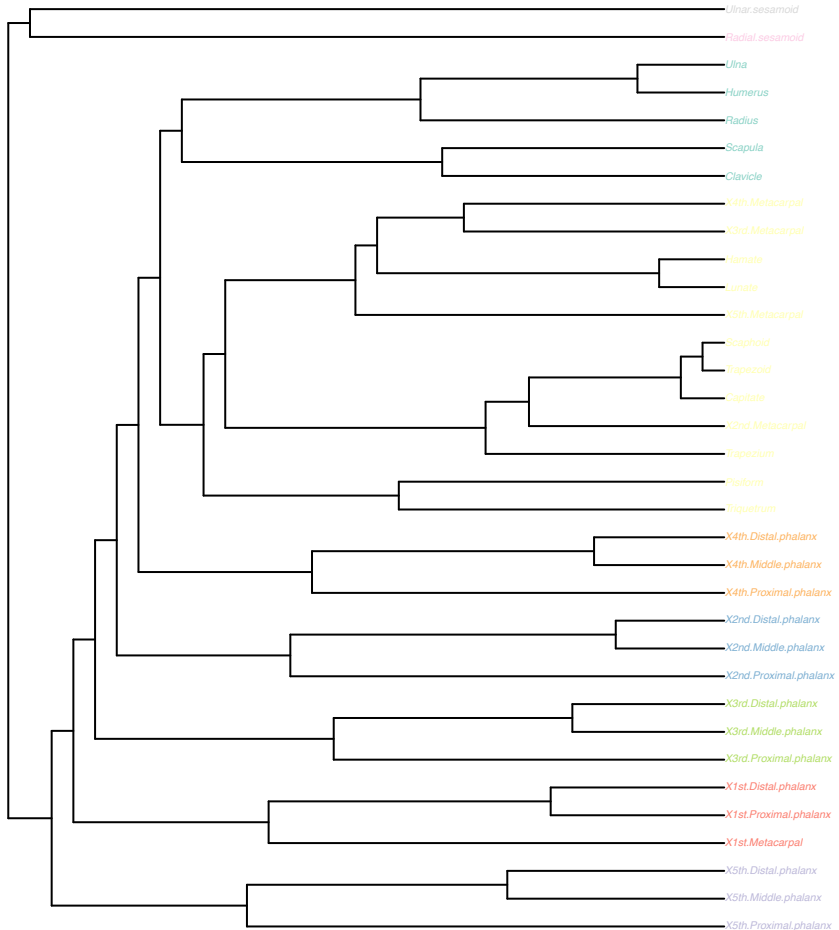

# Newborn Lower Muscular Limb



# Newborn Lower Musculoskeletal Limb

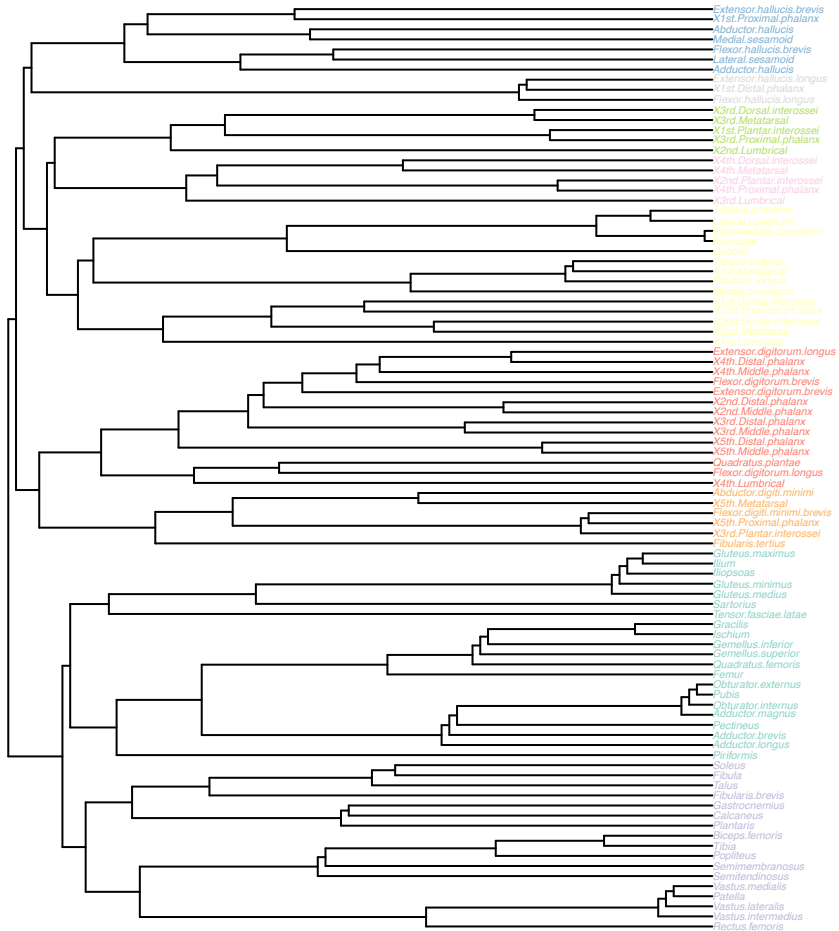



# Newborn Lower Skeletal Limb

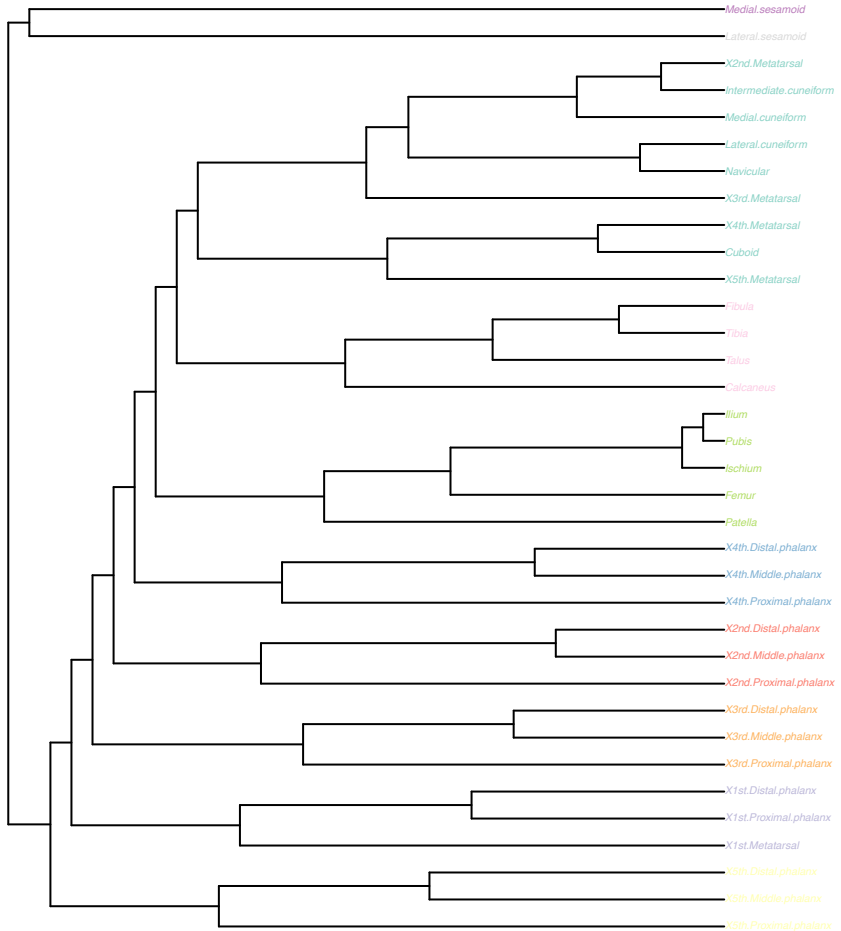

# T18 Lower Left Muscular Limb

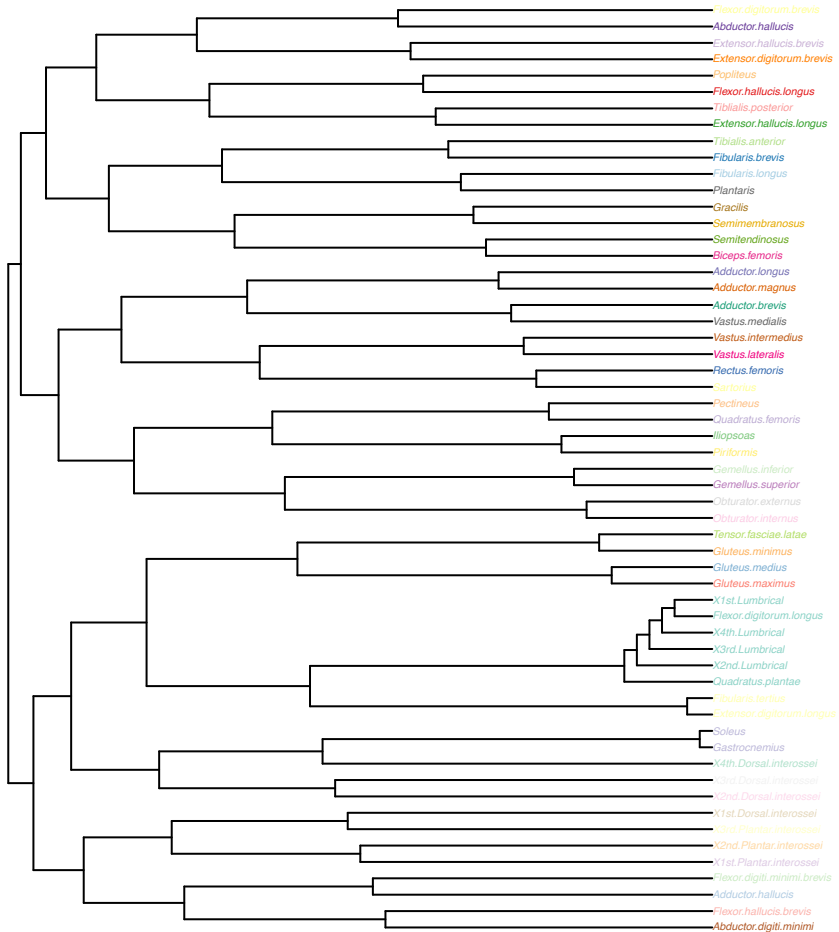

# T18 Lower Left Musculoskeletal Limb

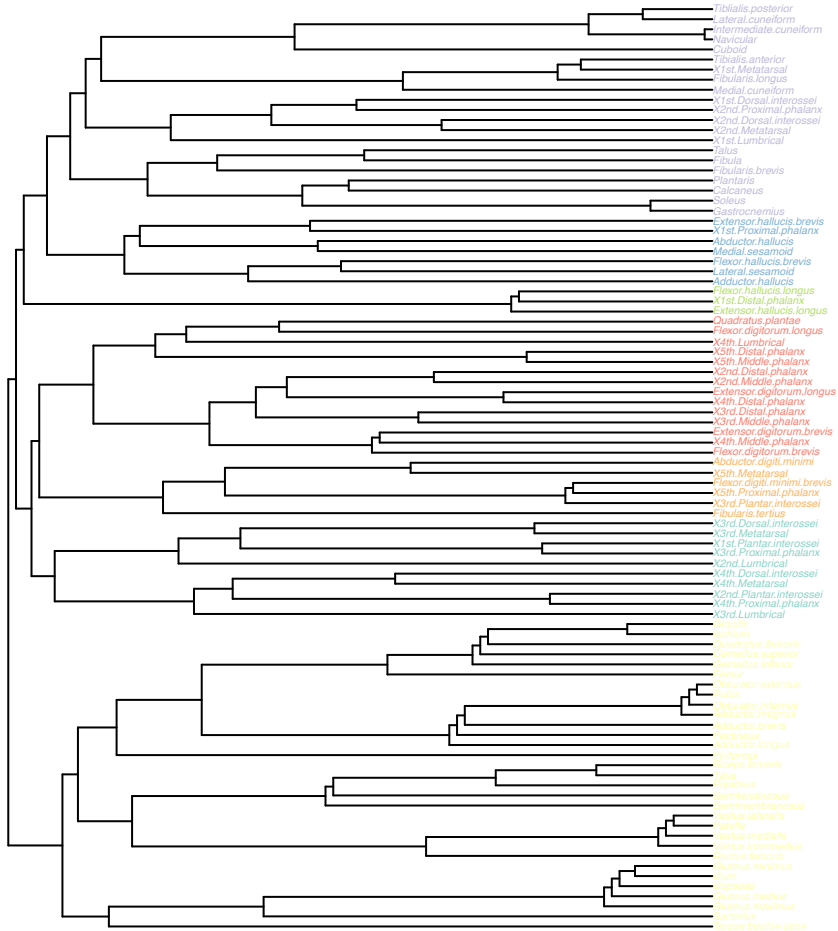

## T18 Lower Left Skeletal Limb

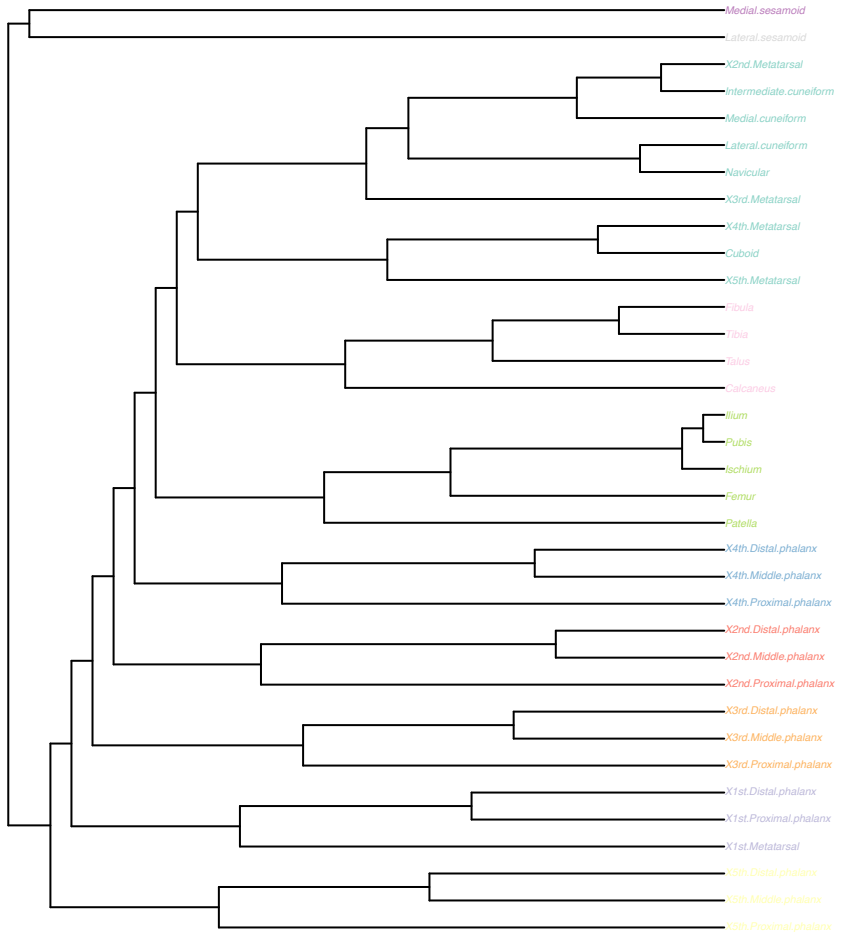

## T18 Lower Right Muscular Limb

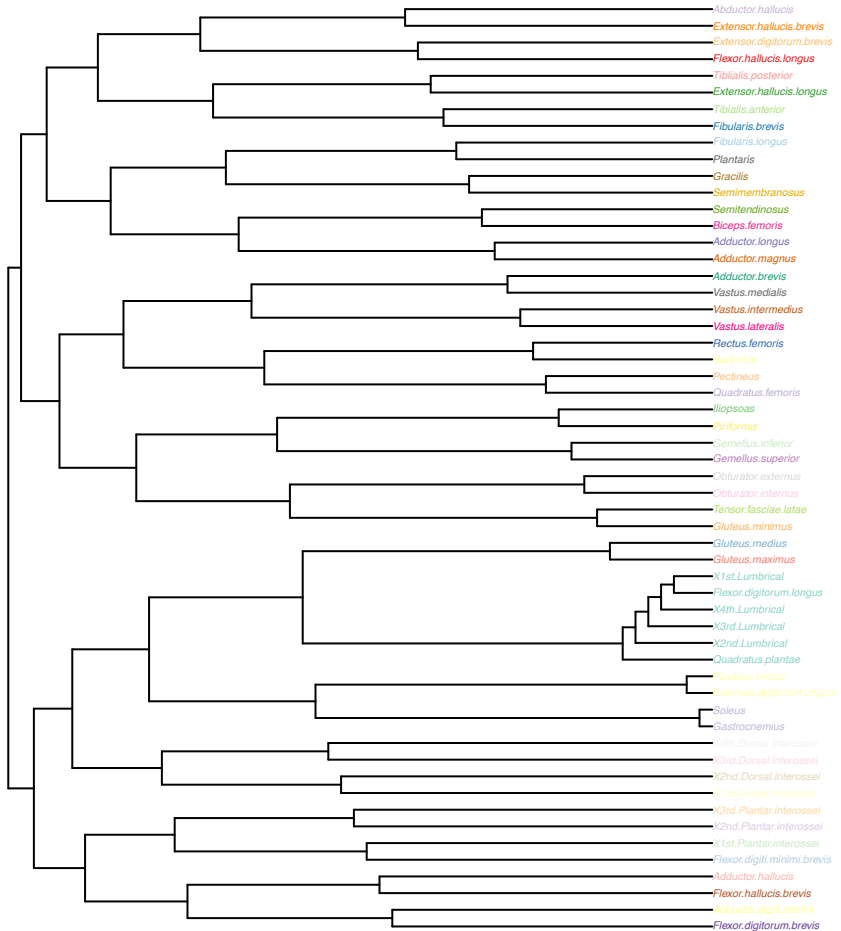

# T18 Lower Right Musculoskeletal Limb

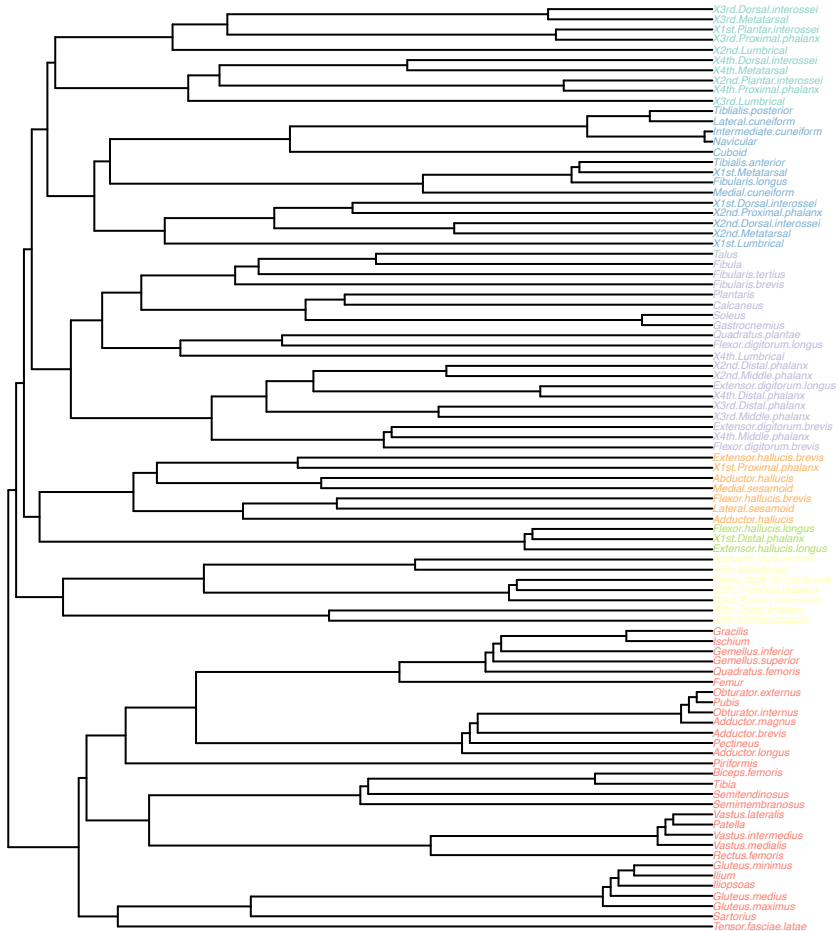

## T18 Lower Right Skeletal Limb



# T18 Upper Left Muscular Limb

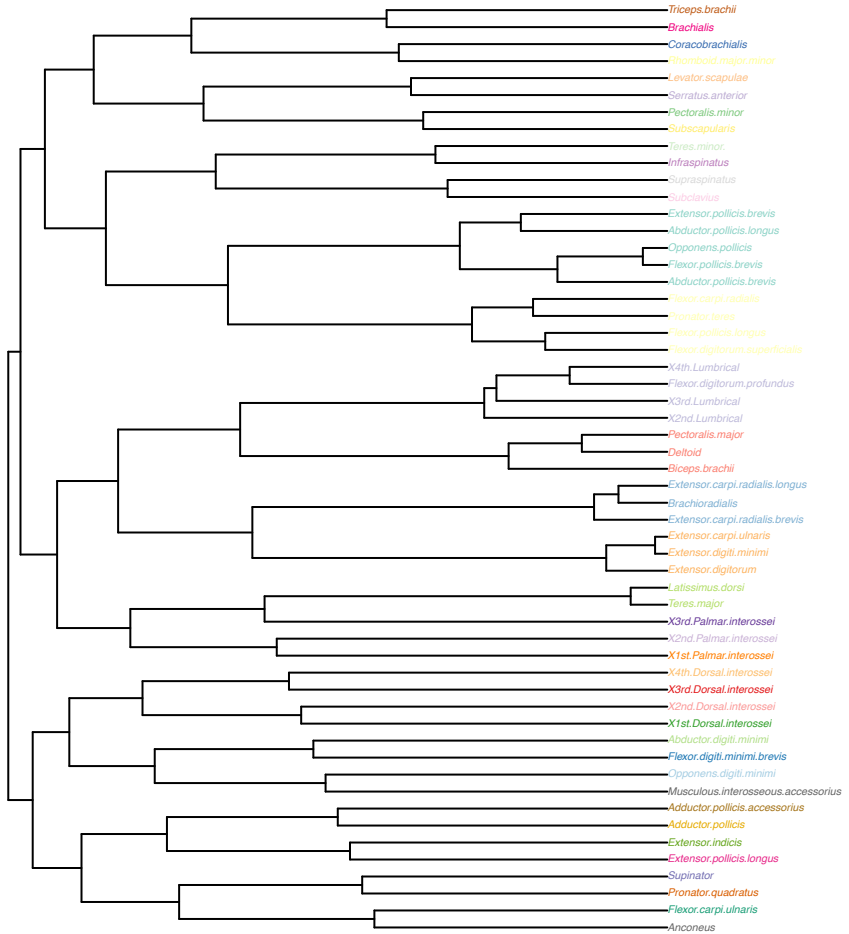



# T18 Upper Left Musculoskeletal Limb

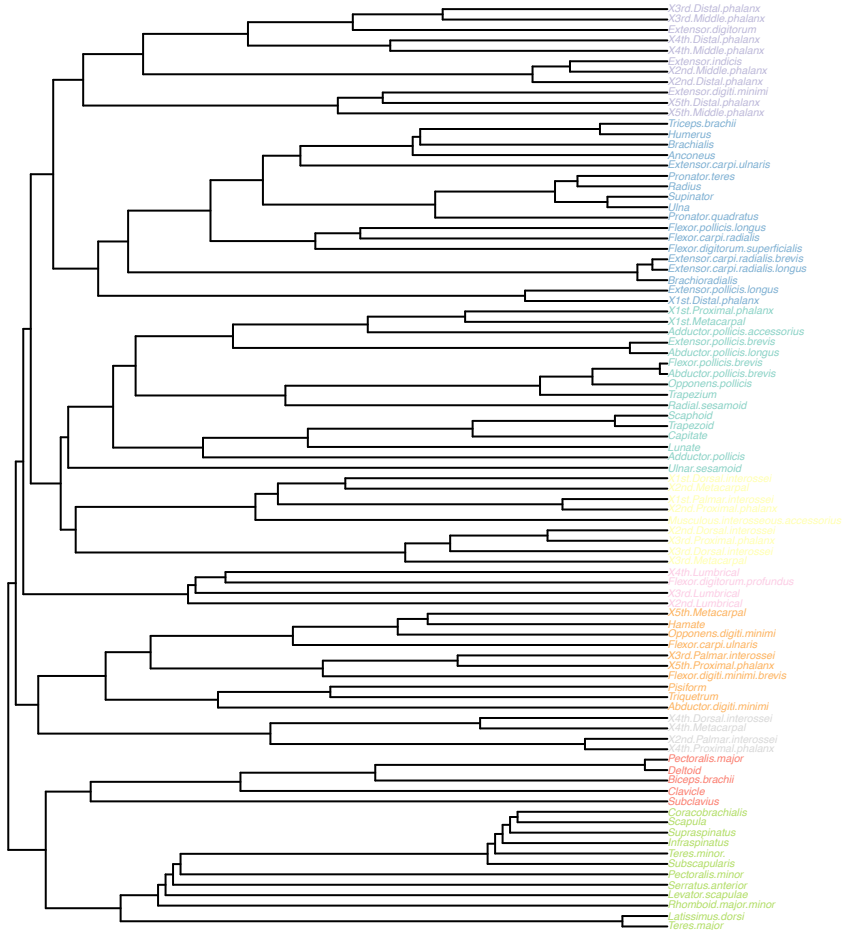

# T18 Upper Left Skeletal Limb

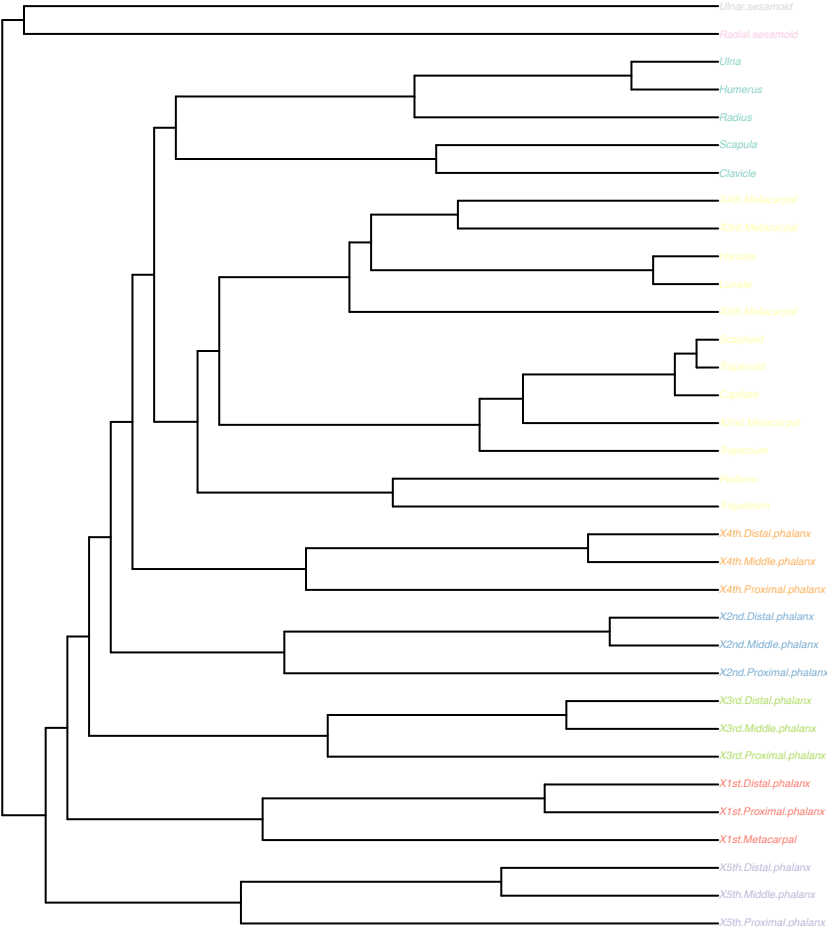

# T18 Upper Right Muscular Limb

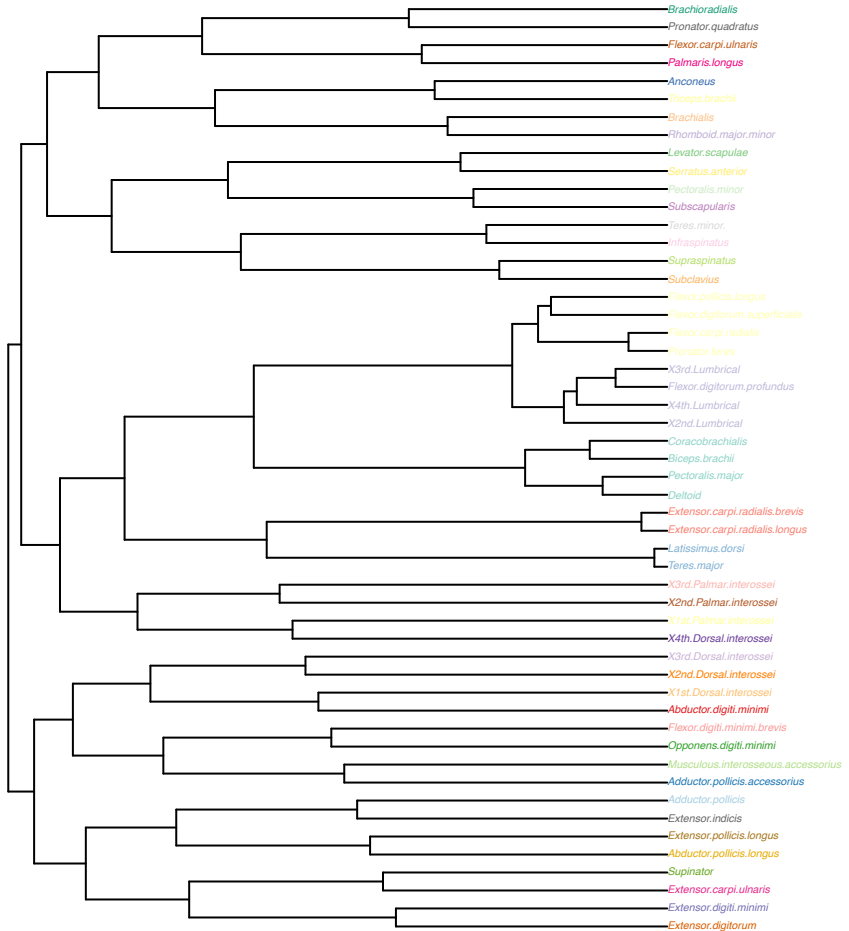

# T18 Upper Right Musculoskeletal Limb

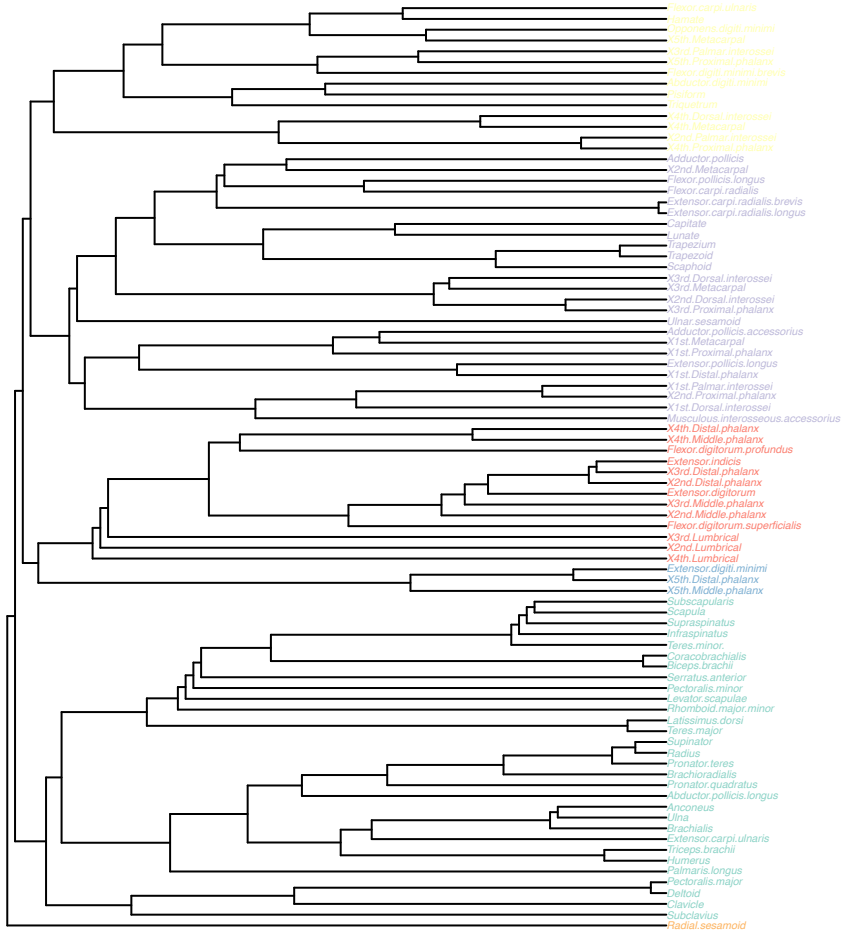

T18 Upper Right Skeletal Limb

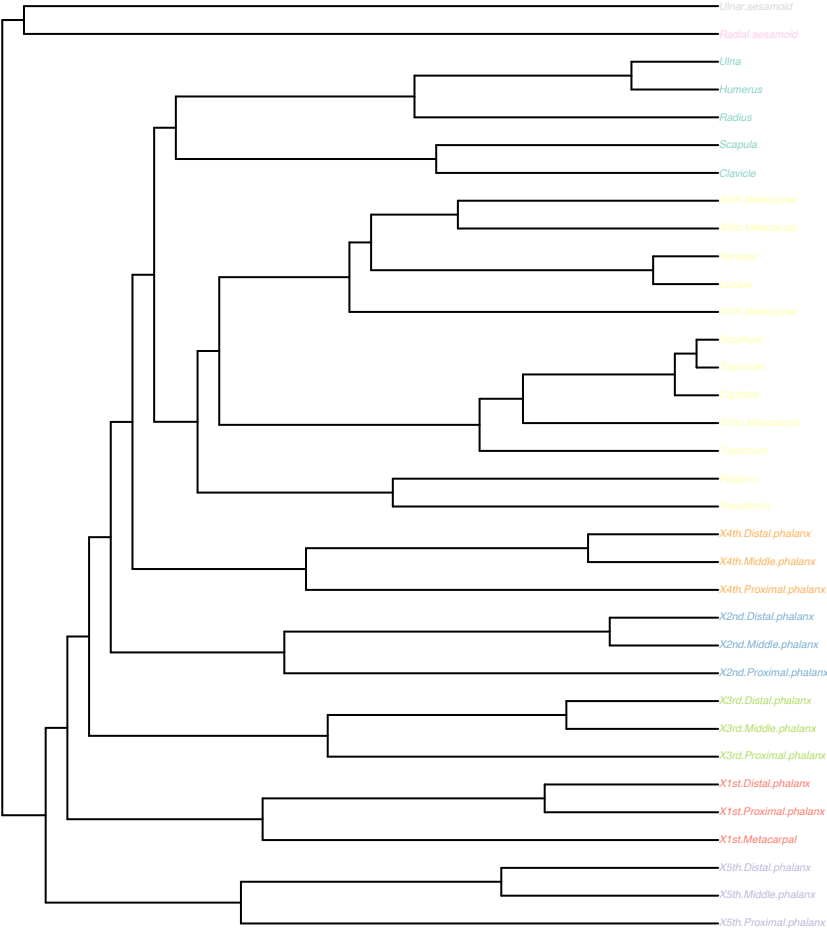

Supplement: Supplementary file [file 1]
